# Supplementary material for: BEL1-like Homeodomain Protein BLH6a Is a Negative Regulator of CAld5H2 in Sinapyl Alcohol Monolignol Biosynthesis in Poplar
Source: Front Plant Sci. 2021 Jun 25;12:695223. doi: 10.3389/fpls.2021.695223 (PMC8269948; doi:10.3389/fpls.2021.695223)
Supplement: Supplementary Data Sheet 2 — Sequence motif analysis of the fragments 6 and 7 in CAld5H2 promoter. [file Data_Sheet_2.XLS]

## Sheet: promoter_analysis
Dataset 2: Sequence motif analysis of the fragments 6 and 7 in CAld5H2 promoter.
Matrix ID	Family	Position	Strand	Similar Score	Hit Sequence	TF ID or Motif name
TFmatrixID_0002	AT-Hook	213	+	0.96	atTAATTaat	AT1G63480
		213	-	0.96	attAATTAat
TFmatrixID_0004		133	+	1	aAATATattc	AT4G14465
		133	-	0.99	aaatATATTc
TFmatrixID_0005		372	+	1	taATTAAata
TFmatrixID_0007		372	+	0.97	tAATTAaata	AT4G35390
TFmatrixID_0008		133	+	1	aAATATattc
		133	-	0.99	aaatATATTc
TFmatrixID_0009		377	-	0.98	aAATAAataa
TFmatrixID_0029	MYB-related	184	+	0.91	aaaATATCga	AT2G46830
TFmatrixID_0031	Dof	384	+	0.99	taAAAAGtgg	AT2G46590
TFmatrixID_0043	MYB; G2-like	446	+	0.95	atGATATccc	AT2G20570
		446	-	0.95	atgATATCcc
TFmatrixID_0044		33	-	0.92	ccAGATTttg
		427	+	0.91	aaaAATCTat
TFmatrixID_0048	Myb/SANT; MYB; G2-like	134	+	1	aataTATTCg	AT5G16560
TFmatrixID_0089	AP2; B3; RAV	537	+	0.96	cacCAACAcata	AT1G13260
TFmatrixID_0130	AT-Hook	132	-	0.94	caaaTATATt	AT1G19485;AT1G48610;AT4G17950;POPTR_0004s20060
TFmatrixID_0131		379	+	1	ataaATAAA	AT1G19485;AT1G48610;POPTR_0004s20060
TFmatrixID_0134		178	+	0.98	gatccAAAAA	AT4G21895;AT5G62260;POPTR_0002s10560;POPTR_0005s17920
TFmatrixID_0137		183	+	1	aaaAATAT
TFmatrixID_0140		425	+	1	aaaAAAAT
TFmatrixID_0142		377	+	1	AAATAaat
TFmatrixID_0144		51	+	0.93	cttaTATTAaat
TFmatrixID_0146		357	+	0.99	caagATAAT
		367	+	0.99	taagATAAT
TFmatrixID_0148		426	+	0.99	aaAAAATc	AT1G19485;AT1G48610;POPTR_0004s20060
TFmatrixID_0174	bHLH	168	-	0.75	ccaTGTGC	AT1G10120;AT1G18400;AT1G25330;AT1G26260;AT1G68920;AT1G73830;AT2G24260;AT3G07340;AT3G23690;AT4G30980;AT4G34530;AT5G48560;AT5G50915;AT5G58010;AT5G62610;AT2G42300;AT3G57800;POPTR_0002s10030;POPTR_0002s11540;POPTR_0002s23650;POPTR_0002s24990;POPTR_0003s16300;POPTR_0004s09850;POPTR_0004s16330;POPTR_0005s12370;POPTR_0005s15590;POPTR_0005s19020;POPTR_0006s05600;POPTR_0006s13790;POPTR_0007s13020;POPTR_00…
TFmatrixID_0176		394	+	0.93	ccaACTTGt	AT1G05805;AT1G35460;AT1G51140;AT2G24260;AT2G42280;AT2G43140;AT4G09180;AT4G30980;POPTR_0001s27680;POPTR_0002s04620;POPTR_0003s22290;POPTR_0005s23930;POPTR_0006s05640;POPTR_0009s06910;POPTR_0013s11200;POPTR_0016s05100;POPTR_0018s11800;POPTR_0019s10900
TFmatrixID_0193	bZIP	89	-	0.75	ataCATGT	AT3G19290;AT4G34000;POPTR_0002s12710;POPTR_0004s14790;POPTR_0006s08300;POPTR_0009s10400;POPTR_0009s16610;POPTR_0014s02810
		91	+	0.75	ACATGttt
		257	+	0.88	ACACTtgt
		257	-	0.88	acaCTTGT
TFmatrixID_0211	C2H2	256	+	1	tACACTt	AT1G27730;AT3G49930;AT3G60580;AT5G04340;AT5G43170;POPTR_0001s30260;POPTR_0009s09250;POPTR_0014s01760
TFmatrixID_0213		256	+	1	tACACTt	AT1G02030;AT2G45120;AT3G19580;AT3G49930;AT3G60580;AT5G04340;AT5G43170;POPTR_0001s30260;POPTR_0002s14460;POPTR_0009s09250;POPTR_0014s01760
TFmatrixID_0222	CSD	382	+	1	aATAAAaa	AT2G21060;AT4G38680
TFmatrixID_0226	TCR; CPP	129	-	1	atTCAAAt	AT3G22760;AT3G22780;AT4G14770;POPTR_0010s09350
TFmatrixID_0227		128	-	1	gatTCAAAta	AT4G29000;POPTR_0006s16340;POPTR_0018s08960
TFmatrixID_0233	Dof	384	+	1	taAAAAGtgg	AT1G64620
TFmatrixID_0234		385	+	1	aAAAAGt	AT2G37590
TFmatrixID_0235		384	+	1	taAAAAGt	AT3G21270
TFmatrixID_0237		385	+	1	aAAAAGtgg	AT3G47500
TFmatrixID_0238		383	+	1	ataAAAAGt	AT4G38000
TFmatrixID_0239		384	+	1	taAAAAGtgg	AT5G39660
TFmatrixID_0243		384	+	1	taAAAAGt	AT5G62940
TFmatrixID_0280	Homeodomain; HD-ZIP	211	-	0.98	tcATTAAtta	AT1G05230;AT1G17920;AT1G73360;AT1G79840;AT3G03260;AT3G61150;AT5G46880;POPTR_0001s02030;POPTR_0001s18470;POPTR_0002s15610;POPTR_0002s23080;POPTR_0003s05100;POPTR_0003s09470;POPTR_0004s01980;POPTR_0004s07310;POPTR_0011s00520;POPTR_0012s13390;POPTR_0014s07130;POPTR_0014s15010;POPTR_0015s05050;POPTR_0015s13340;POPTR_0017s01400
		215	+	0.98	taaTTAATgg
TFmatrixID_0288		211	+	1	tcaTTAATtaa	AT1G05230;AT1G17920;AT3G61150;AT4G00730;AT5G46880;POPTR_0001s02030;POPTR_0001s18470;POPTR_0002s15610;POPTR_0002s23080;POPTR_0003s05100;POPTR_0003s09470;POPTR_0004s01980;POPTR_0011s00520;POPTR_0012s13390;POPTR_0014s07130;POPTR_0014s15010;POPTR_0015s05050;POPTR_0015s13340;POPTR_0017s01400
		214	-	1	ttaATTAAtgg
TFmatrixID_0290		210	-	0.98	gtcATTAAtt	AT1G05230;AT1G17920;AT2G32370;AT3G61150;AT4G21750;AT5G46880;POPTR_0001s02030;POPTR_0002s15610;POPTR_0002s23080;POPTR_0003s09470;POPTR_0004s01980;POPTR_0004s07310;POPTR_0011s00520;POPTR_0012s13390;POPTR_0014s07130;POPTR_0014s15010;POPTR_0015s05050;POPTR_0015s13340;POPTR_0017s01400
		216	+	0.98	aaTTAATggg
TFmatrixID_0320	Myb/SANT; MYB-related	185	-	0.86	aaATATCga	AT1G01520;AT3G09600;AT4G01280;AT5G02840;AT5G52660;POPTR_0002s16460;POPTR_0004s07160;POPTR_0006s13530;POPTR_0014s08520;POPTR_0016s08470;POPTR_0017s01140
TFmatrixID_0323	Myb/SANT	184	+	0.99	aaaATATCga	POPTR_0004s07270;POPTR_0012s03530;POPTR_0015s05430
TFmatrixID_0334	Myb/SANT; MYB-related	184	+	0.98	aaaATATCg	AT1G18330;AT3G10113
TFmatrixID_0339	Myb/SANT	447	-	0.97	tgaTATCCctc	AT1G74840;POPTR_0008s19610;POPTR_0010s04860
TFmatrixID_0364	Myb/SANT; MYB-related	185	+	0.96	aaATATCg	AT3G09600;AT4G01280;POPTR_0006s13530;POPTR_0016s08470
TFmatrixID_0369	Myb/SANT; MYB-related	185	+	0.98	aaATATCga	AT1G01060;AT5G37260;POPTR_0002s18170;POPTR_0004s07270;POPTR_0014s10240
TFmatrixID_0384	NAC; NAM	315	-	0.79	ataAGTAAa	AT1G33060;AT3G49530;AT4G35580;AT5G24590;POPTR_0001s45700;POPTR_0011s15230;POPTR_0012s00760;POPTR_0015s00640
TFmatrixID_0412	Sox; YABBY	369	+	1	agaTAATTaa	AT1G23420
		371	-	1	atAATTAaat
TFmatrixID_0418	TBP	287	+	1	ATATAaa	AT1G55520;AT3G13445;POPTR_0013s05580;POPTR_0019s04890
		435	+	1	ATATAaa
TFmatrixID_0419		134	+	1	aaTATAT
		135	-	1	ATATAtt
TFmatrixID_0421	TCP	532	+	0.99	atagGCACCa	AT1G30210;AT1G67260;AT1G68800;AT3G02150;AT3G18550;POPTR_0001s38480;POPTR_0004s06440;POPTR_0004s11510;POPTR_0008s11470;POPTR_0010s14030;POPTR_0011s02350;POPTR_0011s09890;POPTR_0012s05660;POPTR_0015s03140;POPTR_0015s06980;POPTR_0017s13050;POPTR_0017s13980
TFmatrixID_0508	MADS box; MIKC	181	+	0.91	cCAAAAatatc	AT4G22950;AT4G24540;AT5G51860;AT5G60910;AT5G62165;AT1G24260;AT1G26310;AT2G45650;AT3G30260;AT3G57230;AT3G57390;AT3G61120;AT4G09960;AT4G11880;POPTR_0001s08510;POPTR_0001s13660;POPTR_0001s33600;POPTR_0002s09290;POPTR_0002s10570;POPTR_0002s15310;POPTR_0003s16800;POPTR_0003s16820;POPTR_0003s16840;POPTR_0003s16850;POPTR_0003s16870;POPTR_0004s06310;POPTR_0004s11430;POPTR_0004s11450;POPTR_0006s04730;POPT…
TFmatrixID_0527	AP2; B3; RAV	537	-	0.96	cacCAACAcata	AT1G13260;POPTR_0008s11600;POPTR_0010s13930
TFmatrixID_0560		537	-	0.96	cacCAACAcata
TFmatrixID_0569	TBP	235	-	0.97	tctccttaTTTATag	AT1G55520;AT3G13445;POPTR_0013s05580;POPTR_0019s04890
TFmatrixID_0571		241	-	1	taTTTATa
		378	+	0.96	aATAAAta
TFmatrixID_0585		240	-	0.97	ttaTTTATaga
TFmatrixID_0605	B3	253	-	0.89	gtcTACACtt	AT4G31610
TFmatrixID_0609	MYB-related	184	+	0.92	aaaATATCga	AT5G17300
TFmatrixID_0610		185	+	0.98	aaATATCgaa
TFmatrixID_0628	Homeodomain; bZIP; HD-ZIP; WOX	213	+	1	atTAATTaat	AT4G35550
		213	-	1	attAATTAat
		370	+	0.96	gaTAATTaaa
		370	-	0.97	gatAATTAaa
TF_motif_seq_0067	HB-PHD	108	-	0.73	ttggcaATTAG	AT4G29940
TF_motif_seq_0072	HD-ZIP	308	+	0.73	GCATTgaataa	AT5G52170
TF_motif_seq_0082	bZIP	256	+	0.73	TACACttgttt	AT5G06960;AT5G10030
TF_motif_seq_0088		300	-	0.82	tgatttCAGCA	AT4G02640
TF_motif_seq_0136	HD-ZIP	308	+	0.71	GCATTgaataagta	AT5G17320
TF_motif_seq_0237	GATA; tify	24	-	1	CATCT	AT1G51600;AT2G45050;AT3G06740;AT3G16870;AT3G21175;AT3G24050;AT3G54810;AT3G60530;AT4G17570;AT4G24470;AT4G26150;AT4G32890;AT4G34680;AT5G25830;AT5G26930;AT5G56860;AT5G66320;AT2G18380;AT3G50870;AT4G36620
		35	+	1	AGATT
		60	-	1	AATCA
		85	-	1	AATCA
		127	+	1	TGATT
		142	+	1	CGATA
		159	+	1	GGATG
		177	+	1	TGATC
		178	-	1	GATCC
		188	-	1	TATCG
		300	+	1	TGATT
		359	+	1	AGATA
		369	+	1	AGATA
		430	-	1	AATCT
		447	+	1	TGATA
		450	-	1	TATCC
		470	-	1	CATCG
		501	+	1	GGATT
		527	-	1	CATCC
		552	-	1	CATCC
TF_motif_seq_0239	Dof	197	+	1	AAAGA	AT1G29160;AT1G64620;AT2G37590;AT3G21270;AT3G45610;AT3G47500;AT4G38000;AT5G39660;AT5G60200;AT5G60850;AT5G62940;AT2G46590;AT1G07640;AT1G21340;AT1G26790;AT1G47655;AT1G51700;AT1G69570;AT2G28510;AT2G28810;AT2G34140;AT3G50410;AT3G55370;AT3G61850;AT4G00940;AT4G21050;AT4G21080;AT4G24060;AT5G02460;AT5G62430;AT5G65590;AT5G66940
		207	+	1	AAAGT
		229	-	1	ACCTT
		237	-	1	TCCTT
		250	+	1	AAAGT
		270	-	1	ACCTT
		271	-	1	CCTTT
		329	-	1	TCTTT
		351	-	1	ACCTT
		387	+	1	AAAGT
		439	+	1	AAAGC
		476	+	1	AAAGT
		491	+	1	AAAGT
TF_motif_seq_0241	ZF-HD	56	+	1	ATTAA	AT1G75240
		114	+	1	ATTAG
		213	+	1	ATTAA
		214	-	1	TTAAT
		217	+	1	ATTAA
		218	-	1	TTAAT
		361	-	1	ATAAT
		371	-	1	ATAAT
		374	+	1	ATTAA
		503	+	1	ATTAC
TF_motif_seq_0243	GATA; tify	143	+	1	GATAG	AT1G51600;AT2G45050;AT3G06740;AT3G16870;AT3G21175;AT3G24050;AT3G54810;AT3G60530;AT4G17570;AT4G24470;AT4G26150;AT4G32890;AT4G34680;AT5G25830;AT5G26930;AT5G56860;AT5G66320;AT2G18380;AT3G50870;AT4G36620
		187	-	1	ATATC
		360	+	1	GATAA
		370	+	1	GATAA
		448	+	1	GATAT
		449	-	1	ATATC
TF_motif_seq_0246	Homeodomain; TALE	209	-	1	AGTCA	AT1G23380;AT1G62360;AT1G70510;AT4G08150
TF_motif_seq_0252	Myb/SANT; MYB; ARR-B;MYB;ARR-B	35	+	1	AGATT	AT2G01760;AT3G16857;AT4G16110;AT4G18020;AT4G31920;AT5G58080;AT1G67710;AT1G49190;AT2G25180;AT5G49240
		430	-	1	AATCT
		501	+	1	GGATT
TF_motif_seq_0254	AP2; ERF	25	+	0.8	ATCTC	AT3G14230
		34	-	0.8	CAGAT
		53	-	0.8	TATAT
		58	-	0.8	TAAAT
		65	-	0.8	TAGTT
		90	-	0.8	TACAT
		116	-	0.8	TAGAA
		119	+	0.8	AACTA
		135	+	0.8	ATATA
		136	-	0.8	TATAT
		141	-	0.8	TCGAT
		152	-	0.8	TATAT
		158	-	0.8	TGGAT
		179	+	0.8	ATCCA
		189	+	0.8	ATCGA
		242	+	0.8	ATTTA
		247	-	0.8	TAGAA
		253	+	0.8	GTCTA
		287	+	0.8	ATATA
		299	-	0.8	TTGAT
		358	-	0.8	AAGAT
		364	+	0.8	ATTTA
		368	-	0.8	AAGAT
		376	-	0.8	TAAAT
		380	-	0.8	TAAAT
		431	+	1	ATCTA
		434	-	0.8	TATAT
		435	+	0.8	ATATA
		500	-	0.8	TGGAT
		528	+	0.8	ATCCA
TF_motif_seq_0255	AP2; RAV; B3	540	+	1	CAACA	AT1G25560;AT1G13260
TF_motif_seq_0257	NF-YB;NF-YA;NF-YC	1	-	0.8	ATTGT	AT1G09030;AT1G17590;AT1G21970;AT1G30500;AT1G54160;AT1G54830;AT1G56170;AT1G72830;AT2G38880;AT2G47810;AT3G05690;AT3G14020;AT3G20910;AT3G53340;AT4G14540;AT5G06510;AT5G12840;AT5G27910;AT5G38140;AT5G47640;AT5G47670;AT5G50470;AT5G50480
		106	-	0.8	ATTTG
		107	-	0.8	TTTGG
		111	+	0.8	GCAAT
		114	-	0.8	ATTAG
		132	+	0.8	CAAAT
		139	-	0.8	ATTCG
		144	-	0.8	ATAGG
		155	-	0.8	ATTTG
		156	-	0.8	TTTGG
		181	+	0.8	CCAAA
		202	-	0.8	ATAGG
		220	-	0.8	AATGG
		221	-	0.8	ATGGG
		297	-	0.8	ATTTG
		310	-	0.8	ATTGA
		324	+	0.8	CAAAT
		336	+	0.8	CAAAT
		339	-	1	ATTGG
		356	+	0.8	CCAAG
		389	-	0.8	AGTGG
		394	+	0.8	CCAAC
		443	+	0.8	CCCAT
		471	-	0.8	ATCGG
		532	-	0.8	ATAGG
		539	+	0.8	CCAAC
TF_motif_seq_0258	Dehydrin	29	+	0.8	CCGTC	U01377
		226	+	0.8	CCTAC
		394	+	0.8	CCAAC
		471	-	0.8	ATCGG
		516	+	0.8	CAGAC
		539	+	0.8	CCAAC
TF_motif_seq_0267	Trihelix	20	+	0.8	GTTTC	AT5G01380
		67	+	0.8	GTTGC
		78	-	0.8	GTAAG
		319	-	0.8	GTAAA
		332	+	0.8	TTTAC
		348	-	0.8	GAAAC
		479	+	0.8	GTTGC
		489	-	0.8	GTAAA
		503	+	0.8	ATTAC
TF_motif_seq_0270	WRKY	209	-	1	AGTCA	AT1G13960;AT1G18860;AT1G29280;AT1G29860;AT1G30650;AT1G55600;AT1G62300;AT1G64000;AT1G66550;AT1G68150;AT1G69310;AT1G69810;AT1G80590;AT1G80840;AT2G03340;AT2G23320;AT2G24570;AT2G25000;AT2G30250;AT2G30590;AT2G34830;AT2G37260;AT2G38470;AT2G40740;AT2G40750;AT2G44745;AT2G46130;AT2G46400;AT2G47260;AT3G01080;AT3G01970;AT3G04670;AT3G56400;AT3G58710;AT4G01250;AT4G01720;AT4G04450;AT4G12020;AT4G18170;AT4G22070…
TF_motif_seq_0271	bZIP	30	-	0.8	CGTCC	AT1G77920;AT3G12250;AT5G06950;AT5G06960;AT5G10030;AT5G65210;AT1G22070
		209	-	0.8	AGTCA
		344	+	0.8	AGACG
TF_motif_seq_0281		198	+	1	AAGAAt	AT1G68640
		327	-	1	aTTCTT
TF_motif_seq_0298	bHLH	169	-	1	cATGTG	AT1G32640
TF_motif_seq_0300		169	+	0.83	CATGTg	AT1G09530;AT2G20180;AT4G17880;AT5G46760
		169	-	0.83	cATGTG
		258	+	0.83	CACTTg
		258	-	0.83	cACTTG
TF_motif_seq_0301		169	-	1	cATGTG	AT1G32640
		258	+	1	CACTTg
TF_motif_seq_0302		169	+	1	CATGTg	AT5G08130;AT3G26744
		169	-	1	cATGTG
		258	+	1	CACTTg
		258	-	1	cACTTG
TF_motif_seq_0305	NAC; NAM	169	+	1	CATGTg	AT1G52890;AT3G15500;AT4G27410
TF_motif_seq_0335	B3; ARF;ARF	412	-	1	gAGACA	AT1G19220;AT1G19850;AT1G30330;AT5G20730;AT5G37020;AT5G60450;AT2G33860;AT1G34170;AT1G34310;AT1G34410;AT1G43950;AT1G59750;AT1G77850;AT2G28350;AT2G46530;AT3G61830;AT4G23980;AT4G30080;AT5G62000
TF_motif_seq_0349	(Others)	538	+	0.86	ACCAAca	X67670;X67671
TF_motif_seq_0396	WOX	218	+	1	TTAATgg	AT2G17950
TF_motif_seq_0410	bHLH	89	+	0.88	ATACAtgt	AT1G32640
		291	-	0.75	aaaCTTAT
TF_motif_seq_0508	SBP	28	+	0.75	tcCGTCCag	AT1G20980;AT1G27360;AT1G27370;AT1G53160;AT1G69170;AT1G76580;AT2G33810;AT2G42200;AT2G47070;AT3G15270;AT3G57920;AT3G60030;AT5G18830;AT5G43270
		40	-	0.75	ttGTATGag
		76	-	0.88	ttGTAAGaa
TFmatrixID_0651	B3	16	-	1	tttcgttTCATCtcc	AT5G18090
TFmatrixID_0658	AP2; ERF	21	+	0.95	tttcatctCCGTCca	AT1G19210
TFmatrixID_0679		23	-	0.95	tcatctCCGTCcag
TFmatrixID_0786	ARF	67	+	0.67	gttgctaTTTTGtaagaaaat	AT4G30080
TFmatrixID_0787	ARID	372	-	0.93	tAATTAaataa	AT1G20910
TFmatrixID_0791	ARID; Sox	55	-	0.99	tATTAAatcat	AT1G76110
		212	-	0.96	cATTAAttaat
		213	+	0.96	attaaTTAATg
		373	-	0.99	aATTAAataaa
TFmatrixID_0803	bHLH	391	+	0.99	tggccaACTTGtga	AT1G51140
TFmatrixID_0806		393	-	0.95	gccaACTTGtg	AT1G35460
TFmatrixID_0808		393	+	0.89	gccaACTTGtg
TFmatrixID_0812		393	+	0.97	gccaACTTGtg	AT1G51140
TFmatrixID_0818		393	+	0.98	gccaACTTGtg	AT2G42280
TFmatrixID_0889	Dof	376	+	0.91	taaataaataAAAAGtggcca	AT5G62940
TFmatrixID_0892		377	-	0.95	aaataaataAAAAGtggccaa	AT3G52440
TFmatrixID_0900		186	-	0.92	aatatcgaaaAAAAGaata	AT3G45610
		376	-	0.95	taaataaataAAAAGtggc
TFmatrixID_0901		374	-	0.86	attaaataaataAAAAGtggc	AT3G55370
TFmatrixID_0902		378	-	0.92	aataaataAAAAGtggccaac	AT5G66940
TFmatrixID_0903		378	-	0.94	aataaataAAAAGtggcca	AT5G02460
TFmatrixID_0904		377	-	0.93	aaataaataAAAAGtggc	AT3G47500
TFmatrixID_0905		384	+	0.96	taAAAAGtggc	AT2G46590
TFmatrixID_0906		378	+	0.96	aataaataAAAAGtggcca	AT5G60850
TFmatrixID_0907		384	+	0.96	taAAAAGtggccaa
TFmatrixID_0908		378	+	0.93	aataaataAAAAGtggcca	AT1G64620
TFmatrixID_0910		376	+	0.93	taaataaataAAAAGtggcca	AT1G29160
TFmatrixID_0911		384	+	0.96	taAAAAGtggcca	AT2G46590
TFmatrixID_0912		370	-	0.88	gataattaaataaataAAAAGtggcca	AT1G69570
TFmatrixID_0913		378	+	0.94	aataaataAAAAGtggcca	AT3G47500
TFmatrixID_0914		379	+	0.99	ataaataAAAAGtgg	AT2G37590
TFmatrixID_0917		384	+	0.98	taAAAAGtggc	AT3G52440
TFmatrixID_0918		372	+	0.95	taattaaataaataAAAAGtg	AT1G69570
TFmatrixID_0920		384	+	0.97	taAAAAGtggc	AT4G38000
TFmatrixID_0921		194	-	0.89	aaAAAAGaataggaa	AT1G29160
TFmatrixID_0921		384	-	0.92	taAAAAGtggccaac
TFmatrixID_0922		378	+	0.94	aataaataAAAAGtggccaac	AT1G51700
TFmatrixID_0923		383	+	0.98	ataaAAAGTgg	AT1G47655
TFmatrixID_0951	C2H2	528	+	0.92	atccataggcACCAAcaca	AT4G26030
TFmatrixID_0977		264	-	1	ttTTCAA	AT2G41835
TFmatrixID_0981		300	-	1	tgATTTC	AT3G49930
TFmatrixID_0985	C3H Zinc finger	384	+	0.97	taAAAAGtggc	AT5G63260
TFmatrixID_0986		381	+	0.97	aaataAAAAGtggc	AT3G12130
TFmatrixID_0988		384	+	0.96	taAAAAGtggc	AT5G63260
TFmatrixID_0993	C3H	358	+	0.88	aagataatttaaGATAAtta	AT1G74370
TFmatrixID_0998	NF-YB	263	-	1	gtTTTCA	AT1G09030
		521	+	1	TGAAAac
TFmatrixID_1022	Myb/SANT	133	+	0.92	aaataTATTCgata	AT3G24120
TFmatrixID_1025	Myb/SANT; G2-like	314	+	0.95	aataagtaaacaaATTCTtt	AT2G40260
TFmatrixID_1038		320	+	0.95	taaacaaATTCTttt
TFmatrixID_1044		324	-	0.97	caaATTCTttt	AT2G38300
TFmatrixID_1045		131	+	0.89	tcaaataTATTCgat	AT1G32240
TFmatrixID_1046	Myb/SANT	13	-	0.99	tgTTTTCgt	AT3G13040
		262	-	0.99	tgTTTTCaa
		520	+	0.99	ctGAAAAca
TFmatrixID_1051	GeBP	173	+	0.86	tgcctgATCCAaaaatatc	AT1G66420
TFmatrixID_1064	Homeodomain; HD-ZIP	211	+	0.98	tcATTAAttaa	AT4G00730
		214	-	0.97	ttaaTTAATgg
TFmatrixID_1068		211	+	0.98	tcATTAAttaa
		214	-	0.97	ttaaTTAATgg
TFmatrixID_1069	WOX	212	+	0.94	caTTAATtaat	AT3G03660
		213	-	0.94	attaATTAAtg
		370	-	0.97	gataATTAAat
TFmatrixID_1070	HD-ZIP	211	-	0.99	tcATTAAttaa	AT5G52170
		214	+	0.98	ttaaTTAATgg
TFmatrixID_1074	Homeodomain; HD-ZIP	211	-	0.99	tcATTAAttaa	AT3G61150
		214	+	0.98	ttaaTTAATgg
		372	-	0.9	taATTAAataa
TFmatrixID_1075		57	+	0.91	ttaAATCAtag	AT5G47370
TFmatrixID_1082		211	+	0.97	tcATTAAttaa	AT1G73360
		214	-	0.96	ttaaTTAATgg
TFmatrixID_1084		211	-	0.99	tcATTAAttaa	AT3G61150
		214	+	0.98	ttaaTTAATgg
		372	-	0.89	taATTAAataa
TFmatrixID_1092		58	-	0.87	taaATCATagt	AT4G17460
		83	-	0.87	aaaATCATaca
TFmatrixID_1103	HSF	243	-	0.88	tttaTAGAAagtc	AT2G41690
TFmatrixID_1134	MADS box; MIKC	194	-	0.87	aaaaaagaataGGAAAgt	AT5G10140
		463	-	0.86	ttagcagcatcGGAAAgt
TFmatrixID_1146	Myb/SANT; MYB	532	-	0.89	ataggcACCAAcacataaacc	AT1G16490
TFmatrixID_1149		536	-	0.91	gcACCAAcacataaa	AT3G08500
TFmatrixID_1185		528	+	0.87	atccataggcACCAAcacata	AT1G79180
TFmatrixID_1212	Myb/SANT	525	+	0.93	aacatccataggcACCAAcac	AT3G23250
TFmatrixID_1215	Myb/SANT; MYB	536	-	0.96	gcACCAAcaca	AT3G08500
TFmatrixID_1229	Myb/SANT; MYB-related	183	+	0.92	aaaAATATcgaa	AT1G18330
TFmatrixID_1230	Myb/SANT	180	+	0.97	tccaaaAATATcgaa	AT3G10113
TFmatrixID_1231	MYB-related	181	+	0.95	ccaaaAATATcgaa	AT5G17300
TFmatrixID_1232	Myb/SANT; MYB-related	182	+	0.95	caaaAATATcg	AT1G18330
TFmatrixID_1235		364	-	0.97	atttaaGATAAttaa	AT5G58900
TFmatrixID_1236		182	-	0.94	caaaaATATCg	AT3G09600
TFmatrixID_1237		183	-	0.93	aaaaATATCg	AT1G01060
TFmatrixID_1241		181	-	0.92	ccaaaaATATCg	AT5G52660
TFmatrixID_1242		182	-	0.95	caaaaATATCg	AT1G01060
TFmatrixID_1243		182	-	0.94	caaaaATATCg	AT4G01280
TFmatrixID_1244	MYB-related	183	-	0.97	aaaaATATCg	AT5G17300
TFmatrixID_1247	Myb/SANT; MYB-related	181	-	0.94	ccaaaaATATCg	AT3G09600
TFmatrixID_1249		182	-	0.92	caaaaATATCg	AT4G01280
TFmatrixID_1255		183	-	0.9	aaaAATATcg	AT5G02840
TFmatrixID_1258		182	-	0.92	caaaaATATCg	AT5G52660
TFmatrixID_1260	Myb/SANT; MYB	364	-	0.92	atttaaGATAAttaa	AT5G05790
TFmatrixID_1261	Myb/SANT; MYB-related	182	-	0.9	caaaaATATCg	AT5G02840
TFmatrixID_1263	Myb/SANT; MYB	365	-	0.93	tttaaGATAAttaa	AT3G11280
TFmatrixID_1274	Myb/SANT; MYB-related	364	+	0.91	atttaaGATAAttaa	AT3G10580
TFmatrixID_1275	Myb/SANT; MYB	361	+	0.89	ataatttaaGATAAttaaata	AT2G38090
TFmatrixID_1331	NAC	375	+	0.91	ttaaataaataAAAAGtggcc	AT4G01540
TFmatrixID_1364	(Others)	115	-	0.67	ttagaactatgctgattcaaatATATTcga	AT4G38170
TFmatrixID_1366	(Others)	183	+	0.94	aaaaATATCg	AT2G28920
TFmatrixID_1369	(Others)	265	-	1	tTTCAA	AT1G63040
TFmatrixID_1370	Nin-like	463	+	0.99	ttagCAGCAtcggaa	AT1G20640
TFmatrixID_1375	AP2; B3; RAV	539	-	0.9	cCAACAcataaaccatc	AT1G13260
TFmatrixID_1504	ZF-HD	204	-	0.89	aggaaagtcatTAATTaatggg	AT5G39760
		367	+	0.95	taagatAATTAaataaataaaa
TFmatrixID_1505		210	-	0.97	gtcattAATTAatgg	AT5G65410
		211	+	0.97	tcatTAATTaatggg
		367	-	0.98	taagatAATTAaata
TFmatrixID_1506		212	-	1	catTAATTaat
		213	+	1	attAATTAatg
		370	+	0.99	gatAATTAaat
TFmatrixID_1507		208	+	0.96	aagtcattaATTAAt	AT3G28920
		365	+	0.96	tttaagataATTAAa
TFmatrixID_1508		212	-	1	catTAATTaat	AT5G39760
		213	+	1	attAATTAatg
		370	+	0.98	gatAATTAaat
TFmatrixID_1510		208	+	0.98	aagtcATTAAt	AT1G75240
		212	+	0.97	cattaATTAAt
		213	-	0.97	aTTAATtaatg
		369	+	0.97	agataATTAAa
TFmatrixID_1511		210	+	0.92	gtcattAATTAatgg	AT2G18350
		211	-	0.94	tcatTAATTaatggg
		367	+	0.97	taagatAATTAaata
TFmatrixID_1512		208	+	0.98	aagtcattaATTAAt	AT1G75240
		365	+	0.97	tttaagataATTAAa
TFmatrixID_1513		372	-	0.98	tAATTAaataaataa	AT3G28920
TFmatrixID_1514		210	+	0.94	gtcattAATTAatgg	AT2G18350
		211	-	0.95	tcatTAATTaatggg
		367	+	0.98	taagatAATTAaata
TFmatrixID_1517	Myb/SANT; MYB-related	184	-	1	aaaATATCga	AT1G18330
TFmatrixID_1521		184	+	0.99	aaaATATCga	AT3G09600
TFmatrixID_1522		184	+	0.96	aaaATATCga	AT4G01280
TFmatrixID_1528	TCR; CPP	127	-	0.99	tgatTCAAAt	AT3G22760
TFmatrixID_1544	Dof	385	+	1	aAAAAGtgg	AT1G64620
TFmatrixID_1632	Myb/SANT	31	+	0.9	gtccAGATTttgta	AT3G46640
		425	-	0.89	aaaaaAATCTatat
TFmatrixID_1639		425	-	0.88	aaaaaAATCTatat
TFmatrixID_1680	NAC; NAM	313	+	0.96	gaaTAAGTaaa	AT3G49530
TFmatrixID_1681		313	+	0.96	gaaTAAGTaaa
TFmatrixID_1682		313	-	0.89	gaaTAAGTaaaca
TFmatrixID_1687	NAC	313	+	0.98	gaatAAGTAaaca	AT2G27300
TF_motif_seq_0009	(Motif sequence only)	208	+	0.7	AAGTCattaa	LS7ATPR1
TF_motif_seq_0027	(Motif sequence only)	433	+	1	CTATAtaaag	CARGCW8GAT
TF_motif_seq_0027	(Motif sequence only)	433	-	1	ctataTAAAG
TF_motif_seq_0168	(Motif sequence only)	463	-	0.82	ttagcagcatcGGAAA	AGAMOUSATCONSENSUS
TF_motif_seq_0183	(Motif sequence only)	462	+	0.84	cttagcagcatcGGAAAg	AGL1ATCONSENSUS
TF_motif_seq_0248	(Motif sequence only)	18	-	0.8	TCGTT	MYBCOREATCYCB1
	(Motif sequence only)	29	-	0.8	CCGTC
	(Motif sequence only)	220	+	0.8	AATGG
	(Motif sequence only)	271	-	0.8	CCTTT
	(Motif sequence only)	471	+	0.8	ATCGG
TF_motif_seq_0249	(Motif sequence only)	91	+	0.8	ACATG	ABRELATERD1
	(Motif sequence only)	92	-	0.8	CATGT
	(Motif sequence only)	169	-	0.8	CATGT
	(Motif sequence only)	170	+	0.8	ATGTG
	(Motif sequence only)	258	-	0.8	CACTT
	(Motif sequence only)	259	+	0.8	ACTTG
	(Motif sequence only)	388	+	0.8	AAGTG
	(Motif sequence only)	397	+	0.8	ACTTG
	(Motif sequence only)	421	-	0.8	CACGA
	(Motif sequence only)	543	-	0.8	CACAT
TF_motif_seq_0261	(Motif sequence only)	9	-	0.8	GTCTT	SURECOREATSULTR11
	(Motif sequence only)	20	-	0.8	GTTTC
	(Motif sequence only)	25	-	0.8	ATCTC
	(Motif sequence only)	46	+	0.8	GAGAG
	(Motif sequence only)	164	-	0.8	GCCTC
	(Motif sequence only)	232	-	0.8	TTCTC
	(Motif sequence only)	234	-	0.8	CTCTC
	(Motif sequence only)	253	-	0.8	GTCTA
	(Motif sequence only)	281	+	0.8	GAGAA
	(Motif sequence only)	343	+	1	GAGAC
	(Motif sequence only)	348	+	0.8	GAAAC
	(Motif sequence only)	412	+	1	GAGAC
	(Motif sequence only)	455	-	0.8	CTCTC
	(Motif sequence only)	494	-	0.8	GTCTT
	(Motif sequence only)	516	+	0.8	CAGAC
TF_motif_seq_0263	(Motif sequence only)	67	-	0.8	GTTGC	SORLIP1AT
	(Motif sequence only)	108	-	0.8	TTGGC
	(Motif sequence only)	161	-	0.8	ATGGC
	(Motif sequence only)	164	+	0.8	GCCTC
	(Motif sequence only)	172	-	0.8	GTGCC
	(Motif sequence only)	390	-	1	GTGGC
	(Motif sequence only)	393	+	0.8	GCCAA
	(Motif sequence only)	419	+	1	GCCAC
	(Motif sequence only)	479	-	0.8	GTTGC
	(Motif sequence only)	499	-	0.8	GTGGA
	(Motif sequence only)	535	+	0.8	GGCAC
TF_motif_seq_0265	(Motif sequence only)	162	+	0.8	TGGCC	SORLIP2AT
	(Motif sequence only)	163	-	0.8	GGCCT
	(Motif sequence only)	172	+	0.8	GTGCC
	(Motif sequence only)	223	+	1	GGGCC
	(Motif sequence only)	223	-	0.8	GGGCC
	(Motif sequence only)	224	-	0.8	GGCCT
	(Motif sequence only)	391	+	0.8	TGGCC
	(Motif sequence only)	392	-	0.8	GGCCA
	(Motif sequence only)	417	+	0.8	AGGCC
	(Motif sequence only)	418	-	0.8	GGCCA
	(Motif sequence only)	441	-	0.8	AGCCC
	(Motif sequence only)	535	-	0.8	GGCAC
TF_motif_seq_0268	(Motif sequence only)	35	+	1	AGATT	ARR1AT
	(Motif sequence only)	60	-	1	AATCA
	(Motif sequence only)	85	-	1	AATCA
	(Motif sequence only)	127	+	1	TGATT
	(Motif sequence only)	300	+	1	TGATT
	(Motif sequence only)	430	-	1	AATCT
	(Motif sequence only)	501	+	1	GGATT
TF_motif_seq_0275	(Motif sequence only)	31	-	0.8	GTCCA	WBOXATNPR1
	(Motif sequence only)	102	-	0.8	GTGAA
	(Motif sequence only)	108	+	0.8	TTGGC
	(Motif sequence only)	110	-	0.8	GGCAA
	(Motif sequence only)	130	-	0.8	TTCAA
	(Motif sequence only)	210	-	0.8	GTCAT
	(Motif sequence only)	253	-	0.8	GTCTA
	(Motif sequence only)	266	-	0.8	TTCAA
	(Motif sequence only)	274	+	0.8	TTCAC
	(Motif sequence only)	299	+	0.8	TTGAT
	(Motif sequence only)	311	+	0.8	TTGAA
	(Motif sequence only)	319	-	0.8	GTAAA
	(Motif sequence only)	332	+	0.8	TTTAC
	(Motif sequence only)	393	-	0.8	GCCAA
	(Motif sequence only)	401	-	0.8	GTGAA
	(Motif sequence only)	457	-	0.8	CTCAA
	(Motif sequence only)	489	-	0.8	GTAAA
TF_motif_seq_0291	(Motif sequence only)	465	+	1	AGCAGc	ANAERO2CONSENSUS
TF_motif_seq_0321	(Motif sequence only)	82	+	1	GAAAAt	GT1CONSENSUS
	(Motif sequence only)	192	+	1	GAAAAa
	(Motif sequence only)	283	+	1	GAAAAt
	(Motif sequence only)	360	+	1	GATAAt
	(Motif sequence only)	370	+	1	GATAAt
	(Motif sequence only)	424	+	1	GAAAAa
TF_motif_seq_0334	(Motif sequence only)	222	+	1	TGGGCc	SITEIIATCYTC
	(Motif sequence only)	441	-	1	aGCCCA
TF_motif_seq_0341	(Motif sequence only)	548	+	1	aAACCA	MYB1AT
TF_motif_seq_0343	(Motif sequence only)	11	-	0.86	ctTGTTT	ANAERO1CONSENSUS
	(Motif sequence only)	260	-	0.86	ctTGTTT
	(Motif sequence only)	321	+	1	AAACAaa
TF_motif_seq_0363	(Motif sequence only)	337	-	0.86	aaATTGG	LEAFYATAG
TF_motif_seq_0390	(Motif sequence only)	23	+	0.86	TCATCtc	ANAERO3CONSENSUS
TF_motif_seq_0399	(Motif sequence only)	129	-	0.84	atTCAAA	WBBOXPCWRKY1
	(Motif sequence only)	298	+	0.84	TTTGAtt
TF_motif_seq_0403	(Motif sequence only)	35	-	0.86	AGATTttg	CCA1ATLHCB1
	(Motif sequence only)	427	+	1	aaaAATCT
TF_motif_seq_0404	(Motif sequence only)	96	-	0.88	tttTTTGT	XYLAT
TF_motif_seq_0434	(Motif sequence only)	135	-	0.83	ataTATTC	P1BS
	(Motif sequence only)	151	+	0.83	GTATAttt
	(Motif sequence only)	447	-	0.83	tgaTATCC
TF_motif_seq_0485	(Motif sequence only)	219	-	1	taatGGGCC	UP1ATMSD
